# Supplementary material for: Specific and comprehensive genetic targeting reveals brain-wide distribution and synaptic input patterns of GABAergic axo-axonic interneurons
Source: eLife. 2024 Jul 16;13:RP93481. doi: 10.7554/eLife.93481 (PMC11251723; doi:10.7554/eLife.93481)
Supplement: Figure 4—source data 1. [file elife-93481-fig4-data1.xlsx]

## Sheet: Fig 4 D
CCFv3 Area
Label	Expanded	Mean (Cells/µm3)	S.E.M (Cells/µm3)
EPd	Endopiriform nucleus, dorsal part	0.000721668	0.000243687
EPv	Endopiriform nucleus, ventral part	0.000144084	4.97692e-05
CLA	Claustrum	0.00023249	7.7278e-05

## Sheet: Fig 4 I
CCFv3 Area
Label	Expanded	Mean (Cells/µm3)	S.E.M (Cells/µm3)
LA	Lateral amygdalar nucleus	1.34874e-05	1.48056e-06
BLA	Basolateral amygdalar nucleus	2.21897e-05	4.34906e-06
BMA	Basomedial amygdalar nucleus	1.66533e-05	2.89769e-06
PA	Posterior amygdalar nucleus	1.80002e-05	2.87432e-06

## Sheet: Fig 4 J
CCFv3 Area
Label	Expanded	Mean (Cells/µm3)	S.E.M (Cells/µm3)
AAA	Anterior amygdalar area	1.56954e-05	3.52229e-06
BA	Bed nucleus of the accessory olfactory tract	2.41303e-05	1.01795e-05
IA	Intercalated amygdalar nucleus	8.74807e-05	9.16292e-06
MEA	Medial amygdalar nucleus	0.00152844	0.000268467
CEA	Central amygdalar nucleus	5.79003e-05	2.964e-05

## Sheet: Abbreviations
acronym	name
root	root
grey	Basic cell groups and regions
CH	Cerebrum
CTX	Cerebral cortex
CTXpl	Cortical plate
Isocortex	Isocortex
FRP	Frontal pole, cerebral cortex
FRP1	Frontal pole, layer 1
FRP2/3	Frontal pole, layer 2/3
MO	Somatomotor areas
MO1	Somatomotor areas, Layer 1
MO2/3	Somatomotor areas, Layer 2/3
MO5	Somatomotor areas, Layer 5
MO6a	Somatomotor areas, Layer 6a
MO6b	Somatomotor areas, Layer 6b
MOp	Primary motor area
MOp1	Primary motor area, Layer 1
MOp2/3	Primary motor area, Layer 2/3
MOp5	Primary motor area, Layer 5
MOp6a	Primary motor area, Layer 6a
MOp6b	Primary motor area, Layer 6b
MOs	Secondary motor area
MOs1	Secondary motor area, layer 1
MOs2/3	Secondary motor area, layer 2/3
MOs5	Secondary motor area, layer 5
MOs6a	Secondary motor area, layer 6a
MOs6b	Secondary motor area, layer 6b
SS	Somatosensory areas
SS1	Somatosensory areas, layer 1
SS2/3	Somatosensory areas, layer 2/3
SS4	Somatosensory areas, layer 4
SS5	Somatosensory areas, layer 5
SS6a	Somatosensory areas, layer 6a
SS6b	Somatosensory areas, layer 6b
SSp	Primary somatosensory area
SSp1	Primary somatosensory area, layer 1
SSp2/3	Primary somatosensory area, layer 2/3
SSp4	Primary somatosensory area, layer 4
SSp5	Primary somatosensory area, layer 5
SSp6a	Primary somatosensory area, layer 6a
SSp6b	Primary somatosensory area, layer 6b
SSp-n	Primary somatosensory area, nose
SSp-n1	Primary somatosensory area, nose, layer 1
SSp-n2/3	Primary somatosensory area, nose, layer 2/3
SSp-n4	Primary somatosensory area, nose, layer 4
SSp-n5	Primary somatosensory area, nose, layer 5
SSp-n6a	Primary somatosensory area, nose, layer 6a
SSp-n6b	Primary somatosensory area, nose, layer 6b
SSp-bfd	Primary somatosensory area, barrel field
SSp-bfd1	Primary somatosensory area, barrel field, layer 1
SSp-bfd2/3	Primary somatosensory area, barrel field, layer 2/3
SSp-bfd4	Primary somatosensory area, barrel field, layer 4
SSp-bfd5	Primary somatosensory area, barrel field, layer 5
SSp-bfd6a	Primary somatosensory area, barrel field, layer 6a
SSp-bfd6b	Primary somatosensory area, barrel field, layer 6b
SSp-ll	Primary somatosensory area, lower limb
SSp-ll1	Primary somatosensory area, lower limb, layer 1
SSp-ll2/3	Primary somatosensory area, lower limb, layer 2/3
SSp-ll4	Primary somatosensory area, lower limb, layer 4
SSp-ll5	Primary somatosensory area, lower limb, layer 5
SSp-ll6a	Primary somatosensory area, lower limb, layer 6a
SSp-ll6b	Primary somatosensory area, lower limb, layer 6b
SSp-m	Primary somatosensory area, mouth
SSp-m1	Primary somatosensory area, mouth, layer 1
SSp-m2/3	Primary somatosensory area, mouth, layer 2/3
SSp-m4	Primary somatosensory area, mouth, layer 4
SSp-m5	Primary somatosensory area, mouth, layer 5
SSp-m6a	Primary somatosensory area, mouth, layer 6a
SSp-m6b	Primary somatosensory area, mouth, layer 6b
SSp-ul	Primary somatosensory area, upper limb
SSp-ul1	Primary somatosensory area, upper limb, layer 1
SSp-ul2/3	Primary somatosensory area, upper limb, layer 2/3
SSp-ul4	Primary somatosensory area, upper limb, layer 4
SSp-ul5	Primary somatosensory area, upper limb, layer 5
SSp-ul6a	Primary somatosensory area, upper limb, layer 6a
SSp-ul6b	Primary somatosensory area, upper limb, layer 6b
SSp-tr	Primary somatosensory area, trunk
SSp-tr1	Primary somatosensory area, trunk, layer 1
SSp-tr2/3	Primary somatosensory area, trunk, layer 2/3
SSp-tr4	Primary somatosensory area, trunk, layer 4
SSp-tr5	Primary somatosensory area, trunk, layer 5
SSp-tr6a	Primary somatosensory area, trunk, layer 6a
SSp-tr6b	Primary somatosensory area, trunk, layer 6b
SSs	Supplemental somatosensory area
SSs1	Supplemental somatosensory area, layer 1
SSs2/3	Supplemental somatosensory area, layer 2/3
SSs4	Supplemental somatosensory area, layer 4
SSs5	Supplemental somatosensory area, layer 5
SSs6a	Supplemental somatosensory area, layer 6a
SSs6b	Supplemental somatosensory area, layer 6b
ILA	Infralimbic area
ILA1	Infralimbic area, layer 1
ILA2	Infralimbic area, layer 2
ILA2/3	Infralimbic area, layer 2/3
ILA5	Infralimbic area, layer 5
ILA6a	Infralimbic area, layer 6a
ILA6b	Infralimbic area, layer 6b
GU	Gustatory areas
GU1	Gustatory areas, layer 1
GU2/3	Gustatory areas, layer 2/3
GU4	Gustatory areas, layer 4
GU5	Gustatory areas, layer 5
GU6a	Gustatory areas, layer 6a
GU6b	Gustatory areas, layer 6b
VISC	Visceral area
VISC1	Visceral area, layer 1
VISC2/3	Visceral area, layer 2/3
VISC4	Visceral area, layer 4
VISC5	Visceral area, layer 5
VISC6a	Visceral area, layer 6a
VISC6b	Visceral area, layer 6b
AUD	Auditory areas
AUDd	Dorsal auditory area
AUDd1	Dorsal auditory area, layer 1
AUDd2/3	Dorsal auditory area, layer 2/3
AUDd4	Dorsal auditory area, layer 4
AUDd5	Dorsal auditory area, layer 5
AUDd6a	Dorsal auditory area, layer 6a
AUDd6b	Dorsal auditory area, layer 6b
AUDp	Primary auditory area
AUDp1	Primary auditory area, layer 1
AUDp2/3	Primary auditory area, layer 2/3
AUDp4	Primary auditory area, layer 4
AUDp5	Primary auditory area, layer 5
AUDp6a	Primary auditory area, layer 6a
AUDp6b	Primary auditory area, layer 6b
AUDpo	Posterior auditory area
AUDpo1	Posterior auditory area, layer 1
AUDpo2/3	Posterior auditory area, layer 2/3
AUDpo4	Posterior auditory area, layer 4
AUDpo5	Posterior auditory area, layer 5
AUDpo6a	Posterior auditory area, layer 6a
AUDpo6b	Posterior auditory area, layer 6b
AUDv	Ventral auditory area
AUDv1	Ventral auditory area, layer 1
AUDv2/3	Ventral auditory area, layer 2/3
AUDv4	Ventral auditory area, layer 4
AUDv5	Ventral auditory area, layer 5
AUDv6a	Ventral auditory area, layer 6a
AUDv6b	Ventral auditory area, layer 6b
VIS	Visual areas
VIS1	Visual areas, layer 1
VIS2/3	Visual areas, layer 2/3
VIS4	Visual areas, layer 4
VIS5	Visual areas, layer 5
VIS6a	Visual areas, layer 6a
VIS6b	Visual areas, layer 6b
VISal	Anterolateral visual area
VISal1	Anterolateral visual area, layer 1
VISal2/3	Anterolateral visual area, layer 2/3
VISal4	Anterolateral visual area, layer 4
VISal5	Anterolateral visual area, layer 5
VISal6a	Anterolateral visual area, layer 6a
VISal6b	Anterolateral visual area, layer 6b
VISam	Anteromedial visual area
VISam1	Anteromedial visual area, layer 1
VISam2/3	Anteromedial visual area, layer 2/3
VISam4	Anteromedial visual area, layer 4
VISam5	Anteromedial visual area, layer 5
VISam6a	Anteromedial visual area, layer 6a
VISam6b	Anteromedial visual area, layer 6b
VISl	Lateral visual area
VISl1	Lateral visual area, layer 1
VISl23	Lateral visual area, layer 2/3
VISl4	Lateral visual area, layer 4
VISl5	Lateral visual area, layer 5
VISl6a	Lateral visual area, layer 6a
VISl6b	Lateral visual area, layer 6b
VISp	Primary visual area
VISp1	Primary visual area, layer 1
VISp2/3	Primary visual area, layer 2/3
VISp4	Primary visual area, layer 4
VISp5	Primary visual area, layer 5
VISp6a	Primary visual area, layer 6a
VISp6b	Primary visual area, layer 6b
VISpl	Posterolateral visual area
VISpl1	Posterolateral visual area, layer 1
VISpl2/3	Posterolateral visual area, layer 2/3
VISpl4	Posterolateral visual area, layer 4
VISpl5	Posterolateral visual area, layer 5
VISpl6a	Posterolateral visual area, layer 6a
VISpl6b	Posterolateral visual area, layer 6b
VISpm	posteromedial visual area
VISpm1	posteromedial visual area, layer 1
VISpm2/3	posteromedial visual area, layer 2/3
VISpm4	posteromedial visual area, layer 4
VISpm5	posteromedial visual area, layer 5
VISpm6a	posteromedial visual area, layer 6a
VISpm6b	posteromedial visual area, layer 6b
ACA	Anterior cingulate area
ACA1	Anterior cingulate area, layer 1
ACA2/3	Anterior cingulate area, layer 2/3
ACA5	Anterior cingulate area, layer 5
ACA6a	Anterior cingulate area, layer 6a
ACA6b	Anterior cingulate area, layer 6b
ACAd	Anterior cingulate area, dorsal part
ACAd1	Anterior cingulate area, dorsal part, layer 1
ACAd2/3	Anterior cingulate area, dorsal part, layer 2/3
ACAd5	Anterior cingulate area, dorsal part, layer 5
ACAd6a	Anterior cingulate area, dorsal part, layer 6a
ACAd6b	Anterior cingulate area, dorsal part, layer 6b
ACAv	Anterior cingulate area, ventral part
ACAv1	Anterior cingulate area, ventral part, layer 1
ACAv2/3	Anterior cingulate area, ventral part, layer 2/3
ACAv5	Anterior cingulate area, ventral part, layer 5
ACAv6a	Anterior cingulate area, ventral part, 6a
ACAv6b	Anterior cingulate area, ventral part, 6b
PL	Prelimbic area
PL1	Prelimbic area, layer 1
PL2	Prelimbic area, layer 2
PL2/3	Prelimbic area, layer 2/3
PL5	Prelimbic area, layer 5
PL6a	Prelimbic area, layer 6a
PL6b	Prelimbic area, layer 6b
ORB	Orbital area
ORB1	Orbital area, layer 1
ORB2/3	Orbital area, layer 2/3
ORB5	Orbital area, layer 5
ORB6a	Orbital area, layer 6a
ORB6b	Orbital area, layer 6b
ORBl	Orbital area, lateral part
ORBl1	Orbital area, lateral part, layer 1
ORBl2/3	Orbital area, lateral part, layer 2/3
ORBl5	Orbital area, lateral part, layer 5
ORBl6a	Orbital area, lateral part, layer 6a
ORBl6b	Orbital area, lateral part, layer 6b
ORBm	Orbital area, medial part
ORBm1	Orbital area, medial part, layer 1
ORBm2	Orbital area, medial part, layer 2
ORBm2/3	Orbital area, medial part, layer 2/3
ORBm5	Orbital area, medial part, layer 5
ORBm6a	Orbital area, medial part, layer 6a
ORBv	Orbital area, ventral part
ORBvl	Orbital area, ventrolateral part
ORBvl1	Orbital area, ventrolateral part, layer 1
ORBvl2/3	Orbital area, ventrolateral part, layer 2/3
ORBvl5	Orbital area, ventrolateral part, layer 5
ORBvl6a	Orbital area, ventrolateral part, layer 6a
ORBvl6b	Orbital area, ventrolateral part, layer 6b
AI	Agranular insular area
AId	Agranular insular area, dorsal part
AId1	Agranular insular area, dorsal part, layer 1
AId2/3	Agranular insular area, dorsal part, layer 2/3
AId5	Agranular insular area, dorsal part, layer 5
AId6a	Agranular insular area, dorsal part, layer 6a
AId6b	Agranular insular area, dorsal part, layer 6b
AIp	Agranular insular area, posterior part
AIp1	Agranular insular area, posterior part, layer 1
AIp2/3	Agranular insular area, posterior part, layer 2/3
AIp5	Agranular insular area, posterior part, layer 5
AIp6a	Agranular insular area, posterior part, layer 6a
AIp6b	Agranular insular area, posterior part, layer 6b
AIv	Agranular insular area, ventral part
AIv1	Agranular insular area, ventral part, layer 1
AIv2/3	Agranular insular area, ventral part, layer 2/3
AIv5	Agranular insular area, ventral part, layer 5
AIv6a	Agranular insular area, ventral part, layer 6a
AIv6b	Agranular insular area, ventral part, layer 6b
RSP	Retrosplenial area
RSPagl	Retrosplenial area, lateral agranular part
RSPagl1	Retrosplenial area, lateral agranular part, layer 1
RSPagl2/3	Retrosplenial area, lateral agranular part, layer 2/3
RSPagl5	Retrosplenial area, lateral agranular part, layer 5
RSPagl6a	Retrosplenial area, lateral agranular part, layer 6a
RSPagl6b	Retrosplenial area, lateral agranular part, layer 6b
RSPd	Retrosplenial area, dorsal part
RSPd1	Retrosplenial area, dorsal part, layer 1
RSPd2/3	Retrosplenial area, dorsal part, layer 2/3
RSPd4	Retrosplenial area, dorsal part, layer 4
RSPd5	Retrosplenial area, dorsal part, layer 5
RSPd6a	Retrosplenial area, dorsal part, layer 6a
RSPd6b	Retrosplenial area, dorsal part, layer 6b
RSPv	Retrosplenial area, ventral part
RSPv1	Retrosplenial area, ventral part, layer 1
RSPv2	Retrosplenial area, ventral part, layer 2
RSPv2/3	Retrosplenial area, ventral part, layer 2/3
RSPv5	Retrosplenial area, ventral part, layer 5
RSPv6a	Retrosplenial area, ventral part, layer 6a
RSPv6b	Retrosplenial area, ventral part, layer 6b
PTLp	Posterior parietal association areas
PTLp1	Posterior parietal association areas, layer 1
PTLp2/3	Posterior parietal association areas, layer 2/3
PTLp4	Posterior parietal association areas, layer 4
PTLp5	Posterior parietal association areas, layer 5
PTLp6a	Posterior parietal association areas, layer 6a
PTLp6b	Posterior parietal association areas, layer 6b
TEa	Temporal association areas
TEa1	Temporal association areas, layer 1
TEa2/3	Temporal association areas, layer 2/3
TEa4	Temporal association areas, layer 4
TEa5	Temporal association areas, layer 5
TEa6a	Temporal association areas, layer 6a
TEa6b	Temporal association areas, layer 6b
PERI	Perirhinal area
PERI6a	Perirhinal area, layer 6a
PERI6b	Perirhinal area, layer 6b
PERI1	Perirhinal area, layer 1
PERI5	Perirhinal area, layer 5
PERI2/3	Perirhinal area, layer 2/3
ECT	Ectorhinal area
ECT1	Ectorhinal area/Layer 1
ECT2/3	Ectorhinal area/Layer 2/3
ECT5	Ectorhinal area/Layer 5
ECT6a	Ectorhinal area/Layer 6a
ECT6b	Ectorhinal area/Layer 6b
OLF	Olfactory areas
MOB	Main olfactory bulb
MOBgl	Main olfactory bulb, glomerular layer
MOBgr	Main olfactory bulb, granule layer
MOBipl	Main olfactory bulb, inner plexiform layer
MOBmi	Main olfactory bulb, mitral layer
MOBopl	Main olfactory bulb, outer plexiform layer
AOB	Accessory olfactory bulb
AOBgl	Accessory olfactory bulb, glomerular layer
AOBgr	Accessory olfactory bulb, granular layer
AOBmi	Accessory olfactory bulb, mitral layer
AON	Anterior olfactory nucleus
AONd	Anterior olfactory nucleus, dorsal part
AONe	Anterior olfactory nucleus, external part
AONl	Anterior olfactory nucleus, lateral part
AONm	Anterior olfactory nucleus, medial part
AONpv	Anterior olfactory nucleus, posteroventral part
AON1	Anterior olfactory nucleus, layer 1
AON2	Anterior olfactory nucleus, layer 2
TT	Taenia tecta
TTd	Taenia tecta, dorsal part
TTd1-4	Taenia tecta, dorsal part, layers 1-4
TTd1	Taenia tecta, dorsal part, layer 1
TTd2	Taenia tecta, dorsal part, layer 2
TTd3	Taenia tecta, dorsal part, layer 3
TTd4	Taenia tecta, dorsal part, layer 4
TTv	Taenia tecta, ventral part
TTv1-3	Taenia tecta, ventral part, layers 1-3
TTv1	Taenia tecta, ventral part, layer 1
TTv2	Taenia tecta, ventral part, layer 2
TTv3	Taenia tecta, ventral part, layer 3
DP	Dorsal peduncular area
DP1	Dorsal peduncular area, layer 1
DP2	Dorsal peduncular area, layer 2
DP2/3	Dorsal peduncular area, layer 2/3
DP5	Dorsal peduncular area, layer 5
DP6a	Dorsal peduncular area, layer 6a
PIR	Piriform area
PIR1-3	Piriform area, layers 1-3
PIR1	Piriform area, molecular layer
PIR2	Piriform area, pyramidal layer
PIR3	Piriform area, polymorph layer
NLOT	Nucleus of the lateral olfactory tract
NLOT1-3	Nucleus of the lateral olfactory tract, layers 1-3
NLOT1	Nucleus of the lateral olfactory tract, molecular layer
NLOT2	Nucleus of the lateral olfactory tract, pyramidal layer
NLOT3	Nucleus of the lateral olfactory tract, layer 3
COA	Cortical amygdalar area
COAa	Cortical amygdalar area, anterior part
COAa1	Cortical amygdalar area, anterior part, layer 1
COAa2	Cortical amygdalar area, anterior part, layer 2
COAa3	Cortical amygdalar area, anterior part, layer 3
COAp	Cortical amygdalar area, posterior part
COApl	Cortical amygdalar area, posterior part, lateral zone
COApl1-2	Cortical amygdalar area, posterior part, lateral zone, layers 1-2
COApl1-3	Cortical amygdalar area, posterior part, lateral zone, layers 1-3
COApl1	Cortical amygdalar area, posterior part, lateral zone, layer 1
COApl2	Cortical amygdalar area, posterior part, lateral zone, layer 2
COApl3	Cortical amygdalar area, posterior part, lateral zone, layer 3
COApm	Cortical amygdalar area, posterior part, medial zone
COApm1-2	Cortical amygdalar area, posterior part, medial zone, layers 1-2
COApm1-3	Cortical amygdalar area, posterior part, medial zone, layers 1-3
COApm1	Cortical amygdalar area, posterior part, medial zone, layer 1
COApm2	Cortical amygdalar area, posterior part, medial zone, layer 2
COApm3	Cortical amygdalar area, posterior part, medial zone, layer 3
PAA	Piriform-amygdalar area
PAA1-3	Piriform-amygdalar area, layers 1-3
PAA1	Piriform-amygdalar area, molecular layer
PAA2	Piriform-amygdalar area, pyramidal layer
PAA3	Piriform-amygdalar area, polymorph layer
TR	Postpiriform transition area
TR1-3	Postpiriform transition area, layers 1-3
TR1	Postpiriform transition area, layers 1
TR2	Postpiriform transition area, layers 2
TR3	Postpiriform transition area, layers 3
HPF	Hippocampal formation
HIP	Hippocampal region
CA	Ammon's horn
CA1	Field CA1
CA1slm	Field CA1, stratum lacunosum-moleculare
CA1so	Field CA1, stratum oriens
CA1sp	Field CA1, pyramidal layer
CA1sr	Field CA1, stratum radiatum
CA2	Field CA2
CA2slm	Field CA2, stratum lacunosum-moleculare
CA2so	Field CA2, stratum oriens
CA2sp	Field CA2, pyramidal layer
CA2sr	Field CA2, stratum radiatum
CA3	Field CA3
CA3slm	Field CA3, stratum lacunosum-moleculare
CA3slu	Field CA3, stratum lucidum
CA3so	Field CA3, stratum oriens
CA3sp	Field CA3, pyramidal layer
CA3sr	Field CA3, stratum radiatum
DG	Dentate gyrus
DG-mo	Dentate gyrus, molecular layer
DG-po	Dentate gyrus, polymorph layer
DG-sg	Dentate gyrus, granule cell layer
DG-sgz	Dentate gyrus, subgranular zone
DGcr	Dentate gyrus crest
DGcr-mo	Dentate gyrus crest, molecular layer
DGcr-po	Dentate gyrus crest, polymorph layer
DGcr-sg	Dentate gyrus crest, granule cell layer
DGlb	Dentate gyrus lateral blade
DGlb-mo	Dentate gyrus lateral blade, molecular layer
DGlb-po	Dentate gyrus lateral blade, polymorph layer
DGlb-sg	Dentate gyrus lateral blade, granule cell layer
DGmb	Dentate gyrus medial blade
DGmb-mo	Dentate gyrus medial blade, molecular layer
DGmb-po	Dentate gyrus medial blade, polymorph layer
DGmb-sg	Dentate gyrus medial blade, granule cell layer
FC	Fasciola cinerea
IG	Induseum griseum
RHP	Retrohippocampal region
ENT	Entorhinal area
ENTl	Entorhinal area, lateral part
ENTl1	Entorhinal area, lateral part, layer 1
ENTl2	Entorhinal area, lateral part, layer 2
ENTl2/3	Entorhinal area, lateral part, layer 2/3
ENTl2a	Entorhinal area, lateral part, layer 2a
ENTl2b	Entorhinal area, lateral part, layer 2b
ENTl3	Entorhinal area, lateral part, layer 3
ENTl4	Entorhinal area, lateral part, layer 4
ENTl4/5	Entorhinal area, lateral part, layer 4/5
ENTl5	Entorhinal area, lateral part, layer 5
ENTl5/6	Entorhinal area, lateral part, layer 5/6
ENTl6a	Entorhinal area, lateral part, layer 6a
ENTl6b	Entorhinal area, lateral part, layer 6b
ENTm	Entorhinal area, medial part, dorsal zone
ENTm1	Entorhinal area, medial part, dorsal zone, layer 1
ENTm2	Entorhinal area, medial part, dorsal zone, layer 2
ENTm2a	Entorhinal area, medial part, dorsal zone, layer 2a
ENTm2b	Entorhinal area, medial part, dorsal zone, layer 2b
ENTm3	Entorhinal area, medial part, dorsal zone, layer 3
ENTm4	Entorhinal area, medial part, dorsal zone, layer 4
ENTm5	Entorhinal area, medial part, dorsal zone, layer 5
ENTm5/6	Entorhinal area, medial part, dorsal zone, layer 5/6
ENTm6	Entorhinal area, medial part, dorsal zone, layer 6
ENTmv	Entorhinal area, medial part, ventral zone
ENTmv1	Entorhinal area, medial part, ventral zone, layer 1
ENTmv2	Entorhinal area, medial part, ventral zone, layer 2
ENTmv3	Entorhinal area, medial part, ventral zone, layer 3
ENTmv4	Entorhinal area, medial part, ventral zone, layer 4
ENTmv5/6	Entorhinal area, medial part, ventral zone, layer 5/6
PAR	Parasubiculum
PAR1	Parasubiculum, layer 1
PAR2	Parasubiculum, layer 2
PAR3	Parasubiculum, layer 3
POST	Postsubiculum
POST1	Postsubiculum, layer 1
POST2	Postsubiculum, layer 2
POST3	Postsubiculum, layer 3
PRE	Presubiculum
PRE1	Presubiculum, layer 1
PRE2	Presubiculum, layer 2
PRE3	Presubiculum, layer 3
SUB	Subiculum
SUBd	Subiculum, dorsal part
SUBd-m	Subiculum, dorsal part, molecular layer
SUBd-sp	Subiculum, dorsal part, pyramidal layer
SUBd-sr	Subiculum, dorsal part, stratum radiatum
SUBv	Subiculum, ventral part
SUBv-m	Subiculum, ventral part, molecular layer
SUBv-sp	Subiculum, ventral part, pyramidal layer
SUBv-sr	Subiculum, ventral part, stratum radiatum
CTXsp	Cortical subplate
6b	Layer 6b, isocortex
CLA	Claustrum
EP	Endopiriform nucleus
EPd	Endopiriform nucleus, dorsal part
EPv	Endopiriform nucleus, ventral part
LA	Lateral amygdalar nucleus
BLA	Basolateral amygdalar nucleus
BLAa	Basolateral amygdalar nucleus, anterior part
BLAp	Basolateral amygdalar nucleus, posterior part
BLAv	Basolateral amygdalar nucleus, ventral part
BMA	Basomedial amygdalar nucleus
BMAa	Basomedial amygdalar nucleus, anterior part
BMAp	Basomedial amygdalar nucleus, posterior part
PA	Posterior amygdalar nucleus
CNU	Cerebral nuclei
STR	Striatum
STRd	Striatum dorsal region
CP	Caudoputamen
STRv	Striatum ventral region
ACB	Nucleus accumbens
FS	Fundus of striatum
OT	Olfactory tubercle
isl	Islands of Calleja
islm	Major island of Calleja
OT1-3	Olfactory tubercle, layers 1-3
OT1	Olfactory tubercle, molecular layer
OT2	Olfactory tubercle, pyramidal layer
OT3	Olfactory tubercle, polymorph layer
LSX	Lateral septal complex
LS	Lateral septal nucleus
LSc	Lateral septal nucleus, caudal (caudodorsal) part
LSr	Lateral septal nucleus, rostral (rostroventral) part
LSv	Lateral septal nucleus, ventral part
SF	Septofimbrial nucleus
SH	Septohippocampal nucleus
sAMY	Striatum-like amygdalar nuclei
AAA	Anterior amygdalar area
BA	Bed nucleus of the accessory olfactory tract
CEA	Central amygdalar nucleus
CEAc	Central amygdalar nucleus, capsular part
CEAl	Central amygdalar nucleus, lateral part
CEAm	Central amygdalar nucleus, medial part
IA	Intercalated amygdalar nucleus
MEA	Medial amygdalar nucleus
MEAad	Medial amygdalar nucleus, anterodorsal part
MEAav	Medial amygdalar nucleus, anteroventral part
MEApd	Medial amygdalar nucleus, posterodorsal part
MEApd-a	Medial amygdalar nucleus, posterodorsal part, sublayer a
MEApd-b	Medial amygdalar nucleus, posterodorsal part, sublayer b
MEApd-c	Medial amygdalar nucleus, posterodorsal part, sublayer c
MEApv	Medial amygdalar nucleus, posteroventral part
PAL	Pallidum
PALd	Pallidum, dorsal region
GPe	Globus pallidus, external segment
GPi	Globus pallidus, internal segment
PALv	Pallidum, ventral region
SI	Substantia innominata
MA	Magnocellular nucleus
PALm	Pallidum, medial region
MSC	Medial septal complex
MS	Medial septal nucleus
NDB	Diagonal band nucleus
TRS	Triangular nucleus of septum
PALc	Pallidum, caudal region
BST	Bed nuclei of the stria terminalis
BSTa	Bed nuclei of the stria terminalis, anterior division
BSTal	Bed nuclei of the stria terminalis, anterior division, anterolateral area
BSTam	Bed nuclei of the stria terminalis, anterior division, anteromedial area
BSTdm	Bed nuclei of the stria terminalis, anterior division, dorsomedial nucleus
BSTfu	Bed nuclei of the stria terminalis, anterior division, fusiform nucleus
BSTju	Bed nuclei of the stria terminalis, anterior division, juxtacapsular nucleus
BSTmg	Bed nuclei of the stria terminalis, anterior division, magnocellular nucleus
BSTov	Bed nuclei of the stria terminalis, anterior division, oval nucleus
BSTrh	Bed nuclei of the stria terminalis, anterior division, rhomboid nucleus
BSTv	Bed nuclei of the stria terminalis, anterior division, ventral nucleus
BSTp	Bed nuclei of the stria terminalis, posterior division
BSTd	Bed nuclei of the stria terminalis, posterior division, dorsal nucleus
BSTpr	Bed nuclei of the stria terminalis, posterior division, principal nucleus
BSTif	Bed nuclei of the stria terminalis, posterior division, interfascicular nucleus
BSTtr	Bed nuclei of the stria terminalis, posterior division, transverse nucleus
BSTse	Bed nuclei of the stria terminalis, posterior division, strial extension
BAC	Bed nucleus of the anterior commissure
CB	Cerebellum
CBX	Cerebellar cortex
VERM	Vermal regions
LING	Lingula (I)
LINGmo	Lingula (I), molecular layer
LINGpu	Lingula (I), Purkinje layer
LINGgr	Lingula (I), granular layer
CENT	Central lobule
CENT2	Lobule II
CENT2mo	Lobule II, molecular layer
CENT2pu	Lobule II, Purkinje layer
CENT2gr	Lobule II, granular layer
CENT3	Lobule III
CENT3mo	Lobule III, molecular layer
CENT3pu	Lobule III, Purkinje layer
CENT3gr	Lobule III, granular layer
CUL	Culmen
CUL4	Lobule IV
CUL4mo	Lobule IV, molecular layer
CUL4pu	Lobule IV, Purkinje layer
CUL4gr	Lobule IV, granular layer
CUL5	Lobule V
CUL5mo	Lobule V, molecular layer
CUL5pu	Lobule V, Purkinje layer
CUL5gr	Lobule V, granular layer
CUL4, 5	Lobules IV-V
CUL4, 5mo	Lobules IV-V, molecular layer
CUL4, 5pu	Lobules IV-V, Purkinje layer
CUL4, 5gr	Lobules IV-V, granular layer
DEC	Declive (VI)
DECmo	Declive (VI), molecular layer
DECpu	Declive (VI), Purkinje layer
DECgr	Declive (VI), granular layer
FOTU	Folium-tuber vermis (VII)
FOTUmo	Folium-tuber vermis (VII), molecular layer
FOTUpu	Folium-tuber vermis (VII), Purkinje layer
FOTUgr	Folium-tuber vermis (VII), granular layer
PYR	Pyramus (VIII)
PYRmo	Pyramus (VIII), molecular layer
PYRpu	Pyramus (VIII), Purkinje layer
PYRgr	Pyramus (VIII), granular layer
UVU	Uvula (IX)
UVUmo	Uvula (IX), molecular layer
UVUpu	Uvula (IX), Purkinje layer
UVUgr	Uvula (IX), granular layer
NOD	Nodulus (X)
NODmo	Nodulus (X), molecular layer
NODpu	Nodulus (X), Purkinje layer
NODgr	Nodulus (X), granular layer
HEM	Hemispheric regions
SIM	Simple lobule
SIMmo	Simple lobule, molecular layer
SIMpu	Simple lobule, Purkinje layer
SIMgr	Simple lobule, granular layer
AN	Ansiform lobule
ANcr1	Crus 1
ANcr1mo	Crus 1, molecular layer
ANcr1pu	Crus 1, Purkinje layer
ANcr1gr	Crus 1, granular layer
ANcr2	Crus 2
ANcr2mo	Crus 2, molecular layer
ANcr2pu	Crus 2, Purkinje layer
ANcr2gr	Crus 2, granular layer
PRM	Paramedian lobule
PRMmo	Paramedian lobule, molecular layer
PRMpu	Paramedian lobule, Purkinje layer
PRMgr	Paramedian lobule, granular layer
COPY	Copula pyramidis
COPYmo	Copula pyramidis, molecular layer
COPYpu	Copula pyramidis, Purkinje layer
COPYgr	Copula pyramidis, granular layer
PFL	Paraflocculus
PFLmo	Paraflocculus, molecular layer
PFLpu	Paraflocculus, Purkinje layer
PFLgr	Paraflocculus, granular layer
FL	Flocculus
FLmo	Flocculus, molecular layer
FLpu	Flocculus, Purkinje layer
FLgr	Flocculus, granular layer
CBXmo	Cerebellar cortex, molecular layer
CBXpu	Cerebellar cortex, Purkinje layer
CBXgr	Cerebellar cortex, granular layer
CBN	Cerebellar nuclei
FN	Fastigial nucleus
IP	Interposed nucleus
DN	Dentate nucleus
BS	Brain stem
IB	Interbrain
TH	Thalamus
DORsm	Thalamus, sensory-motor cortex related
VENT	Ventral group of the dorsal thalamus
VAL	Ventral anterior-lateral complex of the thalamus
VM	Ventral medial nucleus of the thalamus
VP	Ventral posterior complex of the thalamus
VPL	Ventral posterolateral nucleus of the thalamus
VPLpc	Ventral posterolateral nucleus of the thalamus, parvicellular part
VPM	Ventral posteromedial nucleus of the thalamus
VPMpc	Ventral posteromedial nucleus of the thalamus, parvicellular part
SPF	Subparafascicular nucleus
SPFm	Subparafascicular nucleus, magnocellular part
SPFp	Subparafascicular nucleus, parvicellular part
SPA	Subparafascicular area
PP	Peripeduncular nucleus
GENd	Geniculate group, dorsal thalamus
MG	Medial geniculate complex
MGd	Medial geniculate complex, dorsal part
MGv	Medial geniculate complex, ventral part
MGm	Medial geniculate complex, medial part
LGd	Dorsal part of the lateral geniculate complex
DORpm	Thalamus, polymodal association cortex related
LAT	Lateral group of the dorsal thalamus
LP	Lateral posterior nucleus of the thalamus
PO	Posterior complex of the thalamus
POL	Posterior limiting nucleus of the thalamus
SGN	Suprageniculate nucleus
ATN	Anterior group of the dorsal thalamus
AV	Anteroventral nucleus of thalamus
AM	Anteromedial nucleus
AMd	Anteromedial nucleus, dorsal part
AMv	Anteromedial nucleus, ventral part
AD	Anterodorsal nucleus
IAM	Interanteromedial nucleus of the thalamus
IAD	Interanterodorsal nucleus of the thalamus
LD	Lateral dorsal nucleus of thalamus
MED	Medial group of the dorsal thalamus
IMD	Intermediodorsal nucleus of the thalamus
MD	Mediodorsal nucleus of thalamus
MDc	Mediodorsal nucleus of the thalamus, central part
MDl	Mediodorsal nucleus of the thalamus, lateral part
MDm	Mediodorsal nucleus of the thalamus, medial part
SMT	Submedial nucleus of the thalamus
PR	Perireunensis nucleus
MTN	Midline group of the dorsal thalamus
PVT	Paraventricular nucleus of the thalamus
PT	Parataenial nucleus
RE	Nucleus of reunions
ILM	Intralaminar nuclei of the dorsal thalamus
RH	Rhomboid nucleus
CM	Central medial nucleus of the thalamus
PCN	Paracentral nucleus
CL	Central lateral nucleus of the thalamus
PF	Parafascicular nucleus
RT	Reticular nucleus of the thalamus
GENv	Geniculate group, ventral thalamus
IGL	Intergeniculate leaflet of the lateral geniculate complex
LGv	Ventral part of the lateral geniculate complex
LGvl	Ventral part of the lateral geniculate complex, lateral zone
LGvm	Ventral part of the lateral geniculate complex, medial zone
SubG	Subgeniculate nucleus
EPI	Epithalamus
MH	Medial habenula
LH	Lateral habenula
PIN	Pineal body
HY	Hypothalamus
PVZ	Periventricular zone
SO	Supraoptic nucleus
ASO	Accessory supraoptic group
NC	Nucleus circularis
PVH	Paraventricular hypothalamic nucleus
PVHm	Paraventricular hypothalamic nucleus, magnocellular division
PVHam	Paraventricular hypothalamic nucleus, magnocellular division, anterior magnocellular part
PVHmm	Paraventricular hypothalamic nucleus, magnocellular division, medial magnocellular part
PVHpm	Paraventricular hypothalamic nucleus, magnocellular division, posterior magnocellular part
PVHpml	Paraventricular hypothalamic nucleus, magnocellular division, posterior magnocellular part, lateral zone
PVHpmm	Paraventricular hypothalamic nucleus, magnocellular division, posterior magnocellular part, medial zone
PVHp	Paraventricular hypothalamic nucleus, parvicellular division
PVHap	Paraventricular hypothalamic nucleus, parvicellular division, anterior parvicellular part
PVHmpd	Paraventricular hypothalamic nucleus, parvicellular division, medial parvicellular part, dorsal zone
PVHpv	Paraventricular hypothalamic nucleus, parvicellular division, periventricular part
PVa	Periventricular hypothalamic nucleus, anterior part
PVi	Periventricular hypothalamic nucleus, intermediate part
ARH	Arcuate hypothalamic nucleus
PVR	Periventricular region
ADP	Anterodorsal preoptic nucleus
AHA	Anterior hypothalamic area
AVP	Anteroventral preoptic nucleus
AVPV	Anteroventral periventricular nucleus
DMH	Dorsomedial nucleus of the hypothalamus
DMHa	Dorsomedial nucleus of the hypothalamus, anterior part
DMHp	Dorsomedial nucleus of the hypothalamus, posterior part
DMHv	Dorsomedial nucleus of the hypothalamus, ventral part
MEPO	Median preoptic nucleus
MPO	Medial preoptic area
OV	Vascular organ of the lamina terminalis
PD	Posterodorsal preoptic nucleus
PS	Parastrial nucleus
PSCH	Suprachiasmatic preoptic nucleus
PVp	Periventricular hypothalamic nucleus, posterior part
PVpo	Periventricular hypothalamic nucleus, preoptic part
SBPV	Subparaventricular zone
SCH	Suprachiasmatic nucleus
SFO	Subfornical organ
VLPO	Ventrolateral preoptic nucleus
MEZ	Hypothalamic medial zone
AHN	Anterior hypothalamic nucleus
AHNa	Anterior hypothalamic nucleus, anterior part
AHNc	Anterior hypothalamic nucleus, central part
AHNd	Anterior hypothalamic nucleus, dorsal part
AHNp	Anterior hypothalamic nucleus, posterior part
MBO	Mammillary body
LM	Lateral mammillary nucleus
MM	Medial mammillary nucleus
Mmme	Medial mammillary nucleus, median part
SUM	Supramammillary nucleus
SUMl	Supramammillary nucleus, lateral part
SUMm	Supramammillary nucleus, medial part
TM	Tuberomammillary nucleus
TMd	Tuberomammillary nucleus, dorsal part
TMv	Tuberomammillary nucleus, ventral part
MPN	Medial preoptic nucleus
MPNc	Medial preoptic nucleus, central part
MPNl	Medial preoptic nucleus, lateral part
MPNm	Medial preoptic nucleus, medial part
PMd	Dorsal premammillary nucleus
PMv	Ventral premammillary nucleus
PVHd	Paraventricular hypothalamic nucleus, descending division
PVHdp	Paraventricular hypothalamic nucleus, descending division, dorsal parvicellular part
PVHf	Paraventricular hypothalamic nucleus, descending division, forniceal part
PVHlp	Paraventricular hypothalamic nucleus, descending division, lateral parvicellular part
PVHmpv	Paraventricular hypothalamic nucleus, descending division, medial parvicellular part, ventral zone
VMH	Ventromedial hypothalamic nucleus
VMHa	Ventromedial hypothalamic nucleus, anterior part
VMHc	Ventromedial hypothalamic nucleus, central part
VMHdm	Ventromedial hypothalamic nucleus, dorsomedial part
VMHvl	Ventromedial hypothalamic nucleus, ventrolateral part
PH	Posterior hypothalamic nucleus
LZ	Hypothalamic lateral zone
LHA	Lateral hypothalamic area
LPO	Lateral preoptic area
PST	Preparasubthalamic nucleus
PSTN	Parasubthalamic nucleus
RCH	Retrochiasmatic area
STN	Subthalamic nucleus
TU	Tuberal nucleus
ZI	Zona incerta
A13	Dopaminergic A13 group
FF	Fields of Forel
ME	Median eminence
MB	Midbrain
MBsen	Midbrain, sensory related
SCs	Superior colliculus, sensory related
SCop	Superior colliculus, optic layer
SCsg	Superior colliculus, superficial gray layer
SCzo	Superior colliculus, zonal layer
IC	Inferior colliculus
ICc	Inferior colliculus, central nucleus
ICd	Inferior colliculus, dorsal nucleus
ICe	Inferior colliculus, external nucleus
NB	Nucleus of the brachium of the inferior colliculus
SAG	Nucleus sagulum
PBG	Parabigeminal nucleus
MEV	Midbrain trigeminal nucleus
MBmot	Midbrain, motor related
SNr	Substantia nigra, reticular part
VTA	Ventral tegmental area
RR	Midbrain reticular nucleus, retrorubral area
MRN	Midbrain reticular nucleus
MRNm	Midbrain reticular nucleus, magnocellular part
MRNmg	Midbrain reticular nucleus, magnocellular part, general
MRNp	Midbrain reticular nucleus, parvicellular part
SCm	Superior colliculus, motor related
SCdg	Superior colliculus, motor related, deep gray layer
SCdw	Superior colliculus, motor related, deep white layer
SCiw	Superior colliculus, motor related, intermediate white layer
SCig	Superior colliculus, motor related, intermediate gray layer
SCig-a	Superior colliculus, motor related, intermediate gray layer, sublayer a
SCig-b	Superior colliculus, motor related, intermediate gray layer, sublayer b
SCig-c	Superior colliculus, motor related, intermediate gray layer, sublayer c
PAG	Periaqueductal gray
PRC	Precommissural nucleus
INC	Interstitial nucleus of Cajal
ND	Nucleus of Darkschewitsch
PRT	Pretectal region
APN	Anterior pretectal nucleus
MPT	Medial pretectal area
NOT	Nucleus of the optic tract
NPC	Nucleus of the posterior commissure
OP	Olivary pretectal nucleus
PPT	Posterior pretectal nucleus
CUN	Cuneiform nucleus
RN	Red nucleus
III	Oculomotor nucleus
EW	Edinger-Westphal nucleus
IV	Trochlear nucleus
VTN	Ventral tegmental nucleus
AT	Anterior tegmental nucleus
LT	Lateral terminal nucleus of the accessory optic tract
DT	Dorsal terminal nucleus of the accessory optic tract
MT	Medial terminal nucleus of the accessory optic tract
SNl	Substantia nigra, lateral part
MBsta	Midbrain, behavioral state related
SNc	Substantia nigra, compact part
PPN	Pedunculopontine nucleus
RAmb	Midbrain raphé nuclei
IF	Interfascicular nucleus raphé
IPN	Interpeduncular nucleus
RL	Rostral linear nucleus raphé
CLI	Central linear nucleus raphé
DR	Dorsal nucleus raphé
HB	Hindbrain
P	Pons
P-sen	Pons, sensory related
NLL	Nucleus of the lateral lemniscus
NLLd	Nucleus of the lateral lemniscus, dorsal part
NLLh	Nucleus of the lateral lemniscus, horizontal part
NLLv	Nucleus of the lateral lemniscus, ventral part
PSV	Principal sensory nucleus of the trigeminal
PB	Parabrachial nucleus
KF	Kolliker-Fuse subnucleus
PBl	Parabrachial nucleus, lateral division
PBlc	Parabrachial nucleus, lateral division, central lateral part
PBld	Parabrachial nucleus, lateral division, dorsal lateral part
PBle	Parabrachial nucleus, lateral division, external lateral part
PBls	Parabrachial nucleus, lateral division, superior lateral part
PBlv	Parabrachial nucleus, lateral division, ventral lateral part
PBm	Parabrachial nucleus, medial division
PBme	Parabrachial nucleus, medial division, external medial part
PBmm	Parabrachial nucleus, medial division, medial medial part
PBmv	Parabrachial nucleus, medial division, ventral medial part
SOC	Superior olivary complex
POR	Superior olivary complex, periolivary region
SOCm	Superior olivary complex, medial part
SOCl	Superior olivary complex, lateral part
P-mot	Pons, motor related
B	Barrington's nucleus
DTN	Dorsal tegmental nucleus
LTN	Lateral tegmental nucleus
PCG	Pontine central gray
PG	Pontine gray
PRNc	Pontine reticular nucleus, caudal part
PRNv	Pontine reticular nucleus, ventral part
SG	Supragenual nucleus
SSN	Superior salivatory nucleus
SUT	Supratrigeminal nucleus
TRN	Tegmental reticular nucleus
V	Motor nucleus of trigeminal
P-sat	Pons, behavioral state related
CS	Superior central nucleus raphé
CSl	Superior central nucleus raphé, lateral part
CSm	Superior central nucleus raphé, medial part
LC	Locus ceruleus
LDT	Laterodorsal tegmental nucleus
NI	Nucleus incertus
PRNr	Pontine reticular nucleus
RPO	Nucleus raphé pontis
SLC	Subceruleus nucleus
SLD	Sublaterodorsal nucleus
MY	Medulla
MY-sen	Medulla, sensory related
AP	Area postrema
CN	Cochlear nuclei
CNlam	Granular lamina of the cochlear nuclei
CNspg	Cochlear nucleus, subpedunclular granular region
DCO	Dorsal cochlear nucleus
VCO	Ventral cochlear nucleus
DCN	Dorsal column nuclei
CU	Cuneate nucleus
GR	Gracile nucleus
ECU	External cuneate nucleus
NTB	Nucleus of the trapezoid body
NTS	Nucleus of the solitary tract
NTSce	Nucleus of the solitary tract, central part
NTSco	Nucleus of the solitary tract, commissural part
NTSge	Nucleus of the solitary tract, gelatinous part
NTSl	Nucleus of the solitary tract, lateral part
NTSm	Nucleus of the solitary tract, medial part
SPVC	Spinal nucleus of the trigeminal, caudal part
SPVI	Spinal nucleus of the trigeminal, interpolar part
SPVO	Spinal nucleus of the trigeminal, oral part
SPVOcdm	Spinal nucleus of the trigeminal, oral part, caudal dorsomedial part
SPVOmdmd	Spinal nucleus of the trigeminal, oral part, middle dorsomedial part, dorsal zone
SPVOmdmv	Spinal nucleus of the trigeminal, oral part, middle dorsomedial part, ventral zone
SPVOrdm	Spinal nucleus of the trigeminal, oral part, rostral dorsomedial part
SPVOvl	Spinal nucleus of the trigeminal, oral part, ventrolateral part
z	Nucleus z
MY-mot	Medulla, motor related
VI	Abducens nucleus
ACVI	Accessory abducens nucleus
VII	Facial motor nucleus
ACVII	Accessory facial motor nucleus
EV	Efferent vestibular nucleus
AMB	Nucleus ambiguus
AMBd	Nucleus ambiguus, dorsal division
AMBv	Nucleus ambiguus, ventral division
DMX	Dorsal motor nucleus of the vagus nerve
ECO	Efferent cochlear group
GRN	Gigantocellular reticular nucleus
ICB	Infracerebellar nucleus
IO	Inferior olivary complex
IRN	Intermediate reticular nucleus
ISN	Inferior salivatory nucleus
LIN	Linear nucleus of the medulla
LRN	Lateral reticular nucleus
LRNm	Lateral reticular nucleus, magnocellular part
LRNp	Lateral reticular nucleus, parvicellular part
MARN	Magnocellular reticular nucleus
MDRN	Medullary reticular nucleus
MDRNd	Medullary reticular nucleus, dorsal part
MDRNv	Medullary reticular nucleus, ventral part
PARN	Parvicellular reticular nucleus
PAS	Parasolitary nucleus
PGRN	Paragigantocellular reticular nucleus
PGRNd	Paragigantocellular reticular nucleus, dorsal part
PGRNl	Paragigantocellular reticular nucleus, lateral part
PHY	Perihypoglossal nuclei
NIS	Nucleus intercalatus
NR	Nucleus of Roller
PRP	Nucleus prepositus
PMR	Paramedian reticular nucleus
PPY	Parapyramidal nucleus
PPYd	Parapyramidal nucleus, deep part
PPYs	Parapyramidal nucleus, superficial part
VNC	Vestibular nuclei
LAV	Lateral vestibular nucleus
MV	Medial vestibular nucleus
SPIV	Spinal vestibular nucleus
SUV	Superior vestibular nucleus
x	Nucleus x
XII	Hypoglossal nucleus
y	Nucleus y
INV	Interstitial nucleus of the vestibular nerve
MY-sat	Medulla, behavioral state related
RM	Nucleus raphé magnus
RPA	Nucleus raphé pallidus
RO	Nucleus raphé obscurus
fiber tracts	fiber tracts
cm	cranial nerves
tn	terminal nerve
von	vomeronasal nerve
In	olfactory nerve
onl	olfactory nerve layer of main olfactory bulb
lotg	lateral olfactory tract, general
lot	lateral olfactory tract, body
lotd	dorsal limb
aolt	accessory olfactory tract
aco	anterior commissure, olfactory limb
IIn	optic nerve
aot	accessory optic tract
bsc	brachium of the superior colliculus
csc	superior colliculus commissure
och	optic chiasm
opt	optic tract
ttp	tectothalamic pathway
IIIn	oculomotor nerve
mlf	medial longitudinal fascicle
pc	posterior commissure
IVn	trochlear nerve
IVd	trochlear nerve decussation
VIn	abducens nerve
Vn	trigeminal nerve
moV	motor root of the trigeminal nerve
sV	sensory root of the trigeminal nerve
mtV	midbrain tract of the trigeminal nerve
sptV	spinal tract of the trigeminal nerve
VIIn	facial nerve
iVIIn	intermediate nerve
gVIIn	genu of the facial nerve
VIIIn	vestibulocochlear nerve
cvb	efferent cochleovestibular bundle
vVIIIn	vestibular nerve
cVIIIn	cochlear nerve
tb	trapezoid body
ias	intermediate acoustic stria
das	dorsal acoustic stria
ll	lateral lemniscus
cic	inferior colliculus commissure
bic	brachium of the inferior colliculus
IXn	glossopharyngeal nerve
Xn	vagus nerve
ts	solitary tract
XIn	accessory spinal nerve
XIIn	hypoglossal nerve
vrt	ventral roots
drt	dorsal roots
cett	cervicothalamic tract
dl	dorsolateral fascicle
dcm	dorsal commissure of the spinal cord
vc	ventral commissure of the spinal cord
fpr	fasciculus proprius
dc	dorsal column
cuf	cuneate fascicle
grf	gracile fascicle
iaf	internal arcuate fibers
ml	medial lemniscus
sst	spinothalamic tract
sttl	lateral spinothalamic tract
sttv	ventral spinothalamic tract
scrt	spinocervical tract
sop	spino-olivary pathway
srp	spinoreticular pathway
svp	spinovestibular pathway
stp	spinotectal pathway
shp	spinohypothalamic pathway
step	spinotelenchephalic pathway
hht	hypothalamohypophysial tract
cbf	cerebellum related fiber tracts
cbc	cerebellar commissure
cbp	cerebellar peduncles
scp	superior cerebelar peduncles
dscp	superior cerebellar peduncle decussation
sct	spinocerebellar tract
uf	uncinate fascicle
sctv	ventral spinocerebellar tract
mcp	middle cerebellar peduncle
icp	inferior cerebellar peduncle
sctd	dorsal spinocerebellar tract
cct	cuneocerebellar tract
jrb	juxtarestiform body
bct	bulbocerebellar tract
oct	olivocerebellar tract
rct	reticulocerebellar tract
tct	trigeminocerebellar tract
arb	arbor vitae
lfbs	lateral forebrain bundle system
cc	corpus callosum
fa	corpus callosum, anterior forceps
ec	external capsule
ee	corpus callosum, extreme capsule
ccg	genu of corpus callosum
fp	corpus callosum, posterior forceps
ccr	corpus callosum, rostrum
ccs	corpus callosum, splenium
cst	corticospinal tract
int	internal capsule
cpd	cerebal peduncle
cte	corticotectal tract
crt	corticorubral tract
cpt	corticopontine tract
cbt	corticobulbar tract
py	pyramid
pyd	pyramidal decussation
cstc	corticospinal tract, crossed
cstu	corticospinal tract, uncrossed
lfbst	thalamus related
em	external medullary lamina of the thalamus
im	internal medullary lamina of the thalamus
mtc	middle thalamic commissure
tp	thalamic peduncles
eps	extrapyramidal fiber systems
epsc	cerebral nuclei related
pap	pallidothalmic pathway
nst	nigrostriatal tract
ntt	nigrothalamic fibers
ptf	pallidotegmental fascicle
snp	striatonigral pathway
stf	subthalamic fascicle
tsp	tectospinal pathway
tspd	direct tectospinal pathway
dtd	doral tegmental decussation
tspc	crossed tectospinal pathway
rust	rubrospinal tract
vtd	ventral tegmental decussation
rrt	rubroreticular tract
ctb	central tegmental bundle
rst	retriculospinal tract
rstl	retriculospinal tract, lateral part
rstm	retriculospinal tract, medial part
vsp	vestibulospinal pathway
mfbs	medial forebrain bundle system
mfbc	cerebrum related
amc	amygdalar capsule
apd	ansa peduncularis
act	anterior commissure, temporal limb
cing	cingulum bundle
fxs	fornix system
alv	alveus
df	dorsal fornix
fi	fimbria
fxprg	precommissural fornix, general
db	precommissural fornix diagonal band
fxpo	postcommissural fornix
mct	medial corticohypothalmic tract
fx	columns of the fornix
hc	hippocampal commissures
dhc	dorsal hippocampal commissure
vhc	ventral hippocampal commissure
per	perforant path
ab	angular path
lab	longitudinal association bundle
st	stria terminalis
mfsbshy	hypothalamus related
mfb	medial forebrain bundle
vlt	ventrolateral hypothalamic tract
poc	preoptic commissure
sup	supraoptic commissures
supa	supraoptic commissures, anterior
supd	supraoptic commissures, dorsal
supv	supraoptic commissures, ventral
pmx	premammillary commissure
smd	supramammillary decussation
php	propriohypothalamic pathways
phpd	propriohypothalamic pathways, dorsal
phpl	propriohypothalamic pathways, lateral
phpm	propriohypothalamic pathways, medial
phpv	propriohypothalamic pathways, ventral
pvbh	periventricular bundle of the hypothalamus
mfbsma	mammillary related
pm	principal mammillary tract
mtt	mammilothalmic tract
mtg	mammillotegmental tract
mp	mammillary peduncle
mfbst	dorsal thalamus related
pvbt	periventricular bundle of the thalamus
mfbse	epithalamus related
sm	stria medullaris
fr	fasciculus retroflexus
hbc	habenular commissure
PIS	pineal stalk
mfbsm	midbrain related
dlf	dorsal longitudinal fascicle
dtt	dorsal tegmental tract
VS	ventricular systems
VL	lateral ventricle
RC	rhinocele
SEZ	subependymal zone
chpl	choroid plexus
chfl	choroid fissure
IVF	interventricular foramen
V3	third ventricle
AQ	cerebral aqueduct
V4	fourth ventricle
V4r	lateral recess
c	central canal, spinal cord/medulla
grv	grooves
grv of CTX	grooves of the cerebral cortex
eg	endorhinal groove
hf	hippocampal fissure
rf	rhinal fissure
ri	rhinal incisure
grv of CBX	grooves of the cerebellar cortex
pce	precentral fissure
pcf	preculminate fissure
pri	primary fissure
psf	posterior superior fissure
ppf	prepyramidal fissure
sec	secondary fissure
plf	posterolateral fissure
nf	nodular fissure
sif	simple fissure
icf	intercrural fissure
apf	ansoparamedian fissure
ipf	intraparafloccular fissure
pms	paramedian sulcus
pfs	parafloccular sulcus
IPF	Interpeduncular fossa
